# Supplementary material
Source: PubMed Central journal article supplement (PMC4196608)
Supplement: 70f11a03d3867a38472be8859fc44f87_genetics.114.167908-5.pdf [file 70f11a03d3867a38472be8859fc44f87_genetics.114.167908-5.pdf]

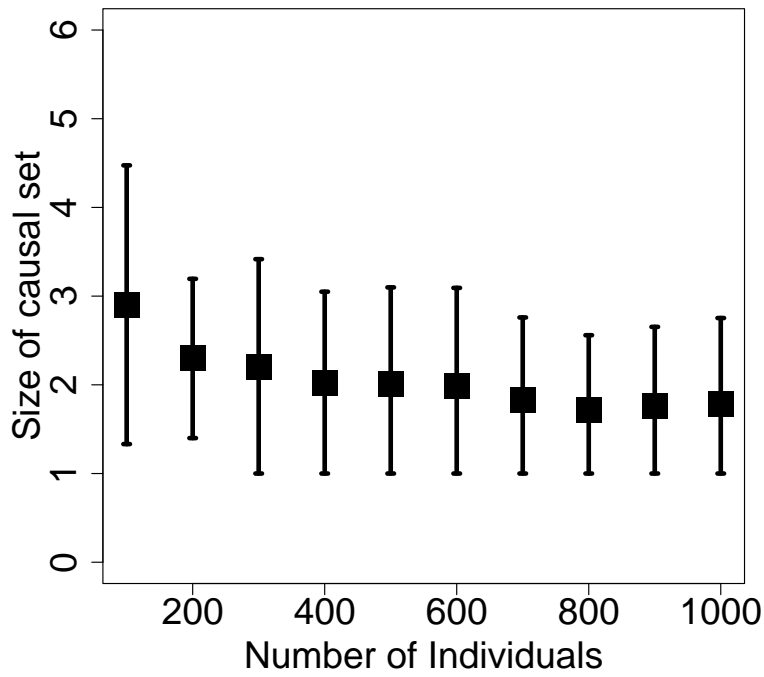

Figure S1: The patterns between the number of individuals collected in each study and the number of causal SNPs selected by CAVIAR. The black squares indicate the mean and the vertical lines indicate the standard deviation of the number of SNPs selected by CAVIAR.
