# Supplementary material
Source: PubMed Central journal article supplement (PMC4196608)
Supplement: 453444461adfd62ad8156c77119f6cc8_genetics.114.167908-4.pdf [file 453444461adfd62ad8156c77119f6cc8_genetics.114.167908-4.pdf]

Table S1: Relation between the  $\rho^*$ , configuration size and recall rate in regions with low amounts of LD. Recall rate indicates the percentage of times where we picked the true causal SNP in our configuration. The configuration size is the average number of SNPs which is predicated to be causal by our method. For each value of  $\rho^*$  we run the experiment for 1000 times.

| $\rho^*$ | Configuration Size       | Recall Rate(%) |
|----------|--------------------------|----------------|
| 0.5      | $1.009862 \pm 0.117203$  | 94.67456       |
| 0.55     | $1.04 \pm 0.1961554$     | 97.2           |
| 0.6      | $1.066667 \pm 0.2572115$ | 96.19048       |
| 0.65     | $1.094412 \pm 0.2992068$ | 98.07322       |
| 0.7      | $1.108 \pm 0.329474$     | 98.8           |
| 0.75     | $1.136905 \pm 0.3498184$ | 99.40476       |
| 0.8      | $1.152642 \pm 0.3599944$ | 99.60861       |
| 0.85     | $1.173307 \pm 0.3943774$ | 99.8008        |
| 0.9      | $1.177083 \pm 0.3981898$ | 99.9           |
| 0.95     | $1.219665 \pm 0.4484662$ | 100            |
