# Supplementary material
Source: PubMed Central journal article supplement (PMC4196608)
Supplement: b04c704564e2441499610ed1aad36747_genetics.114.167908-2.pdf [file b04c704564e2441499610ed1aad36747_genetics.114.167908-2.pdf]

Table S3: Comparison between the solution obtained from solving the posterior probability exactly or using the greedy method.

| $\rho^*$ | Exact Solution           |                | Greedy Solution          |                |
|----------|--------------------------|----------------|--------------------------|----------------|
|          | Configuration Size       | Recall Rate(%) | Configuration Size       | Recall Rate(%) |
| 0.5      | 2.025097 $\pm$ 0.8759341 | 67.3           | 2.015355 $\pm$ 0.9007232 | 67.8           |
| 0.55     | 2.581 $\pm$ 0.9276084    | 70.7           | 2.132411 $\pm$ 1.100085  | 79.5           |
| 0.6      | 2.420152 $\pm$ 1.076278  | 79.4           | 2.433962 $\pm$ 0.784     | 78.6           |
| 0.65     | 2.674721 $\pm$ 1.225183  | 81.2           | 2.750469 $\pm$ 1.187191  | 81.8           |
| 0.7      | 2.82397 $\pm$ 1.203071   | 85.2           | 2.811429 $\pm$ 1.218756  | 85.4           |
| 0.75     | 3.091085 $\pm$ 1.416079  | 87.4           | 3.124314 $\pm$ 1.37983   | 87.8           |
| 0.8      | 3.317526 $\pm$ 1.598748  | 91.1           | 3.274583 $\pm$ 1.554082  | 91.5           |
| 0.85     | 3.514395 $\pm$ 1.633862  | 93.2           | 3.537402 $\pm$ 1.570367  | 92.7           |
| 0.9      | 3.887064 $\pm$ 1.934519  | 95.6           | 3.859345 $\pm$ 1.922601  | 96.3           |
| 0.95     | 4.277992 $\pm$ 1.968794  | 99.6           | 4.165692 $\pm$ 1.938969  | 99.8           |
